# Supplementary material
Source: publisher site journal article supplement (https://www.degruyterbrill.com/publication/isbn/9783110301854/downloadAsset/9783110301854_Inhaltsverzeichnis.pdf)
Supplement: Supplementary file 1 [file 9783110301854_Inhaltsverzeichnis.pdf]

# Inhalt

## Einleitung

|                                                                                    |     |
|------------------------------------------------------------------------------------|-----|
| I. Die Predigten des Origenes über die Samuel und Königsbücher .....               | 3   |
| 1. Nachrichten bei Origenes über Zeit und Ort der Samuelhomilien .....             | 4   |
| 2. Testimonien und Fragmente .....                                                 | 8   |
| II. <i>Medicus animarum</i> – das Selbstbild des Predigers Origenes .....          | 13  |
| 1. Autobiographisches bei Origenes .....                                           | 13  |
| 2. Selbstkritische Töne: Origenes, der strenge Moralphrediger ..                   | 16  |
| 3. <i>Vilis correptio</i> – Pädagogik der heilsamen Kritik .....                   | 20  |
| 4. Frust und Distanz: Der Prediger und seine Gemeinde .....                        | 26  |
| III. <i>Vir unus</i> – das metaphysisch-ethische Einheitsdenken des Origenes ..... | 31  |
| 1. Metaphysik und Ethik in der Religionsphilosophie des Origenes .....             | 32  |
| 2. Tugendlehre der Einheit .....                                                   | 36  |
| 3. Menschliche Schwachheit und göttliche Gnade .....                               | 50  |
| IV. Σαμουήλ ἐν ᾧδου – die Totenbeschwörung in Endor .....                          | 60  |
| 1. Nekromantie im Alten Testament und im antiken Judentum ..                       | 60  |
| 2. Antike christliche Deutungen .....                                              | 67  |
| 3. Die Deutung des Origenes: Bibeltext und Heilsgeschichte ..                      | 91  |
| V. Überlieferung, Ausgaben, Übersetzungen .....                                    | 102 |
| 1. Überlieferung und Ausgaben der griechischen Homilie ....                        | 102 |
| 2. Überlieferung und Ausgaben der lateinischen Homilie .....                       | 108 |
| 3. Überlieferung und Ausgaben der Fragmente .....                                  | 111 |
| 4. Übersetzungen .....                                                             | 113 |

## Die Homilien des Origenes zum Ersten Buch Samuel

|                                                                                               |     |
|-----------------------------------------------------------------------------------------------|-----|
| Die lateinisch erhaltene Homilie über 1 Sam. 1–2 .....                                        | 117 |
| Die Augustinus zugeschriebenen Exzerpte aus der Homilie des<br>Origenes über 1 Sam. 1–2 ..... | 173 |
| Die griechisch erhaltene Homilie über 1 Sam. 28,3–25 .....                                    | 201 |
| Das Papyrus-Exzerpt der Homilie des Origenes über die<br>Wahrsagerin .....                    | 239 |
| Die Fragmente des Origenes zu den Samuel- und<br>Königsbüchern .....                          | 253 |
| Bibliographie                                                                                 |     |
| Quellen .....                                                                                 | 279 |
| Literatur .....                                                                               | 282 |
| Register                                                                                      |     |
| Bibelstellen .....                                                                            | 293 |
| Origenesstellen .....                                                                         | 301 |
| Namen und Sachen .....                                                                        | 309 |
